# Supplementary material
Source: PubMed Central journal article supplement (PMC2141905)
Supplement: pnas_0709613104_4.pdf [file pnas_0709613104_4.pdf]

**Table 1. Lifespans of *ins-7* transgenic animals**

| <i>C. elegans</i> strain | Mean $\pm$ SE  | <i>P</i> value | <i>n</i> (dead/total) |
|--------------------------|----------------|----------------|-----------------------|
| N2                       | 14.1 $\pm$ 0.9 |                | 36/55                 |
| <i>Pges-1::ins-7</i>     | 15.2 $\pm$ 0.8 | 0.2482         | 48/71                 |
| N2                       | 17.0 $\pm$ 1.2 |                | 26/36                 |
| Non-transgenic           | 16.3 $\pm$ 1.3 | 0.7255         | 18/30                 |
| <i>Pges-1::ins-7</i>     | 13.8 $\pm$ 0.7 | 0.0547         | 33/48                 |
| N2                       | 19.2 $\pm$ 0.8 |                | 41/64                 |
| <i>Pges-1::ins-7</i>     | 18.6 $\pm$ 0.9 | 0.1761         | 59/73                 |
| <i>Pges-1::gfp</i>       | 21.4 $\pm$ 0.7 |                | 54/89                 |
| <i>Pges-1::ins-7</i>     | 19.4 $\pm$ 0.5 | 0.0402         | 82/89                 |
| <i>Pges-1::gfp</i>       | 23.0 $\pm$ 0.6 |                | 57/81                 |
| <i>Pges-1::ins-7</i>     | 20.1 $\pm$ 0.6 | 0.0007         | 85/97                 |

Lifespan data contained within the solid lines were done in parallel and statistical analysis was done within the data set.
