# Supplementary material
Source: PubMed Central journal article supplement (PMC2141905)

Fig. 5

a

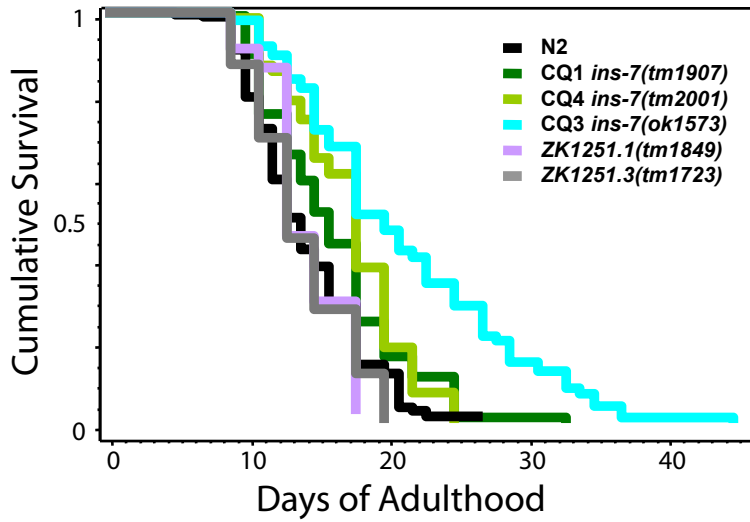

b

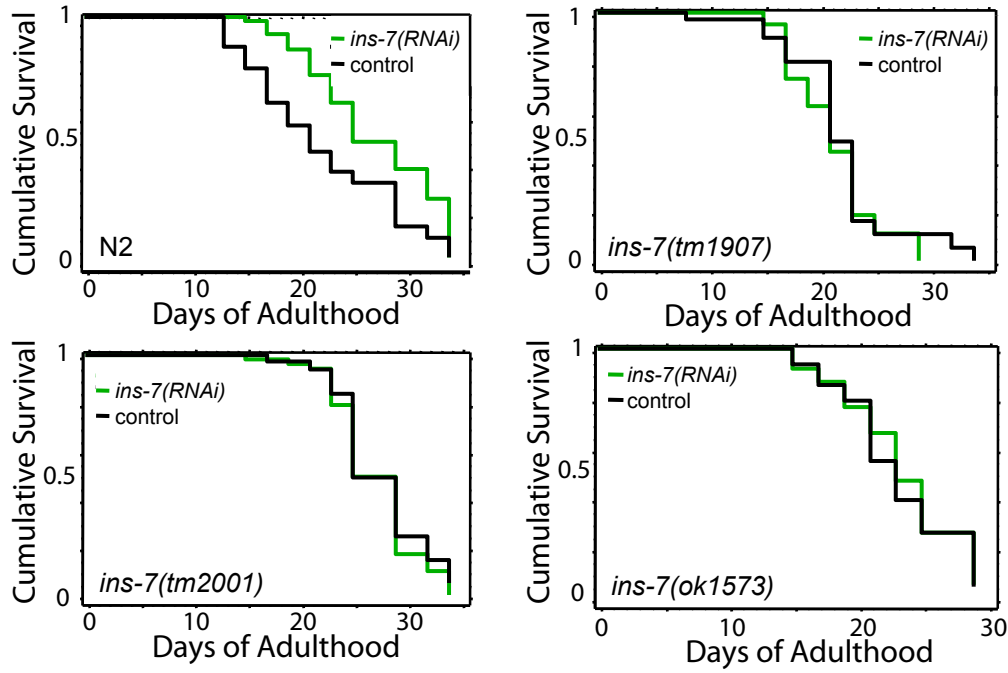

c

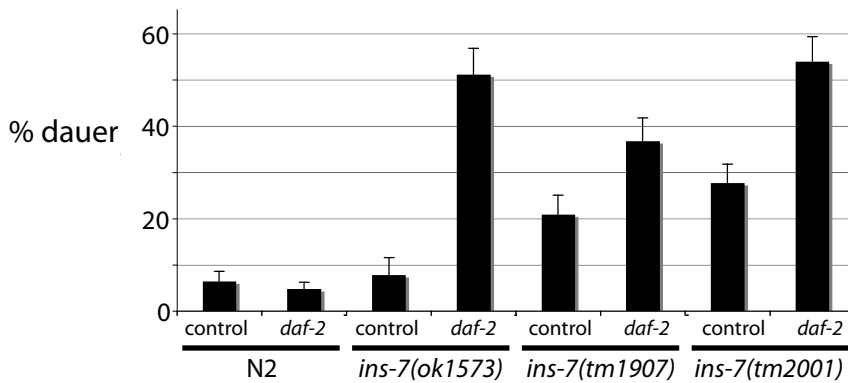

Supplement: pnas_0709613104_1.pdf [file pnas_0709613104_1.pdf]

Fig. 6

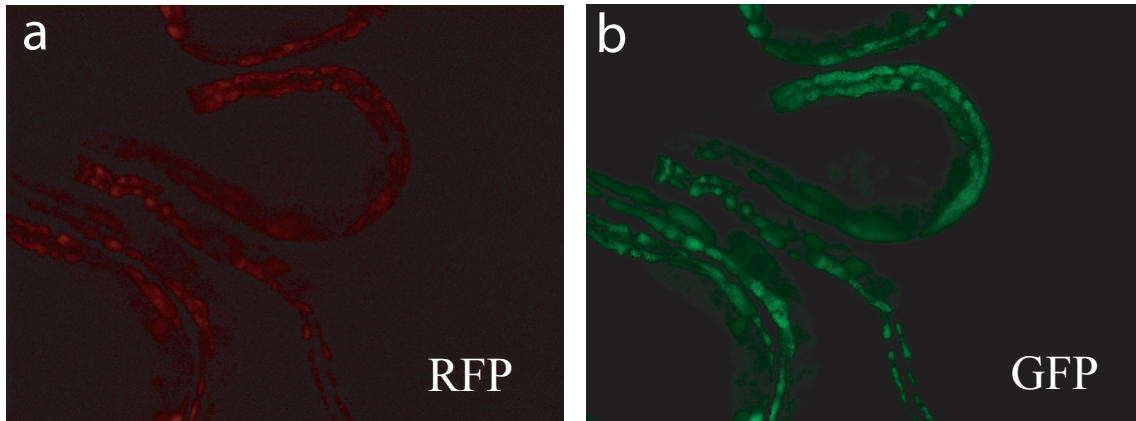

*Pges-1::gfp; Pges-1::rfp*

Supplement: pnas_0709613104_2.pdf [file pnas_0709613104_2.pdf]

Fig. 7

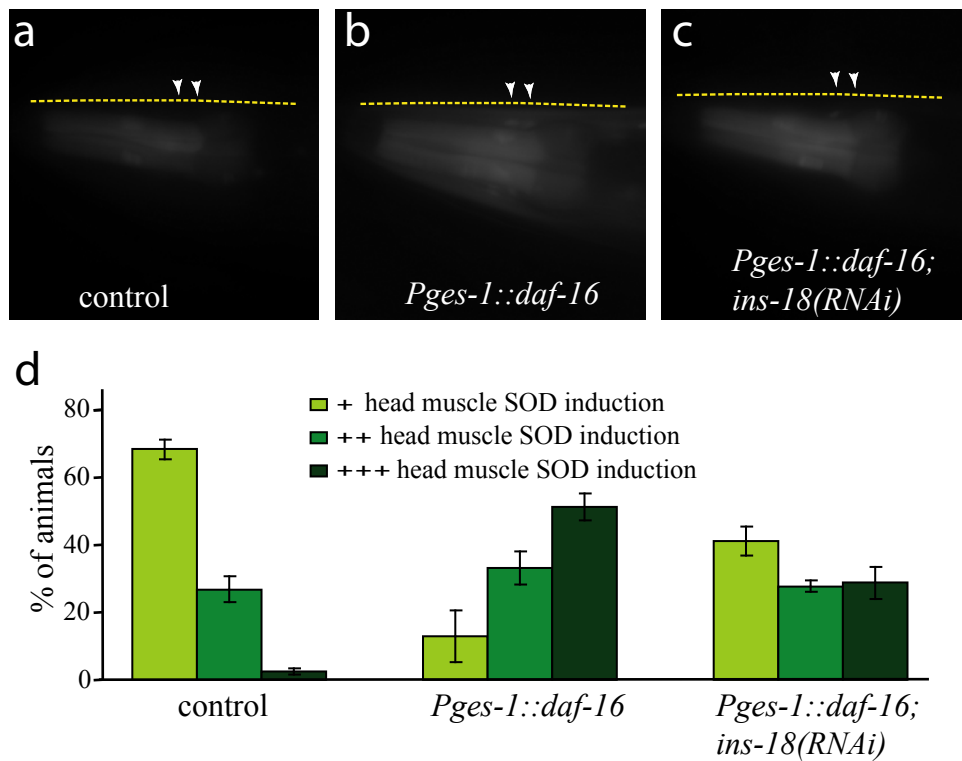

Supplement: pnas_0709613104_3.pdf [file pnas_0709613104_3.pdf]
